# Supplementary material for: Enhancing superconductivity in SrTiO3 films with strain
Source: PubMed Central journal article supplement — Sci Adv. 2019 Apr 26;5(4):eaaw0120. doi: 10.1126/sciadv.aaw0120 (PMC6486228; doi:10.1126/sciadv.aaw0120), 2019-04-26
Supplement: aaw0120_SM.pdf [file aaw0120_SM.pdf]

## Supplementary Materials for

### Enhancing superconductivity in SrTiO<sub>3</sub> films with strain

Kavch Ahadi\*, Luca Galletti, Yuntian Li, Salva Salmani-Rezaie, Wangzhou Wu, Susanne Stemmer

\*Corresponding author. Email: kahadi@mrl.ucsb.edu

Published 26 April 2019, *Sci. Adv.* **5**, eaaw0120 (2019)

DOI: 10.1126/sciadv.aaw0120

#### This PDF file includes:

- Fig. S1.  $2\theta$ - $\omega$  scan of a SrTiO<sub>3</sub> film on LSAT near the 001 reflections.
- Fig. S2. RSM of a SrTiO<sub>3</sub>/LSAT heterostructure around the 113 reflection.
- Fig. S3. Cross-sectional HAADF-STEM images.
- Fig. S4. Magnetic field dependence of the superconducting transition.
- Fig. S5. Superconducting transitions for Sm- and La-doped SrTiO<sub>3</sub> films grown on SrTiO<sub>3</sub> substrates.
- Fig. S6. Resistivity as a function of temperature for Sm-doped SrTiO<sub>3</sub> films grown on SrTiO<sub>3</sub> substrates.

## Supplementary Materials

### X-ray diffraction (XRD) and reciprocal space mapping

High-resolution XRD using a Philips Panalytical X'Pert thin-film diffractometer with Cu K $\alpha$  radiation was used for ex-situ characterization of the films. A representative  $2\theta$ - $\omega$  scan of a SrTiO<sub>3</sub> film around the 001 reflection is shown in fig. S1. Laue (thickness) fringes can be seen, indicating smooth films with high crystalline quality. The out-of-plane lattice parameter is  $3.93 \pm 0.001$  Å, as expected for a fully strained SrTiO<sub>3</sub> film on LSAT.

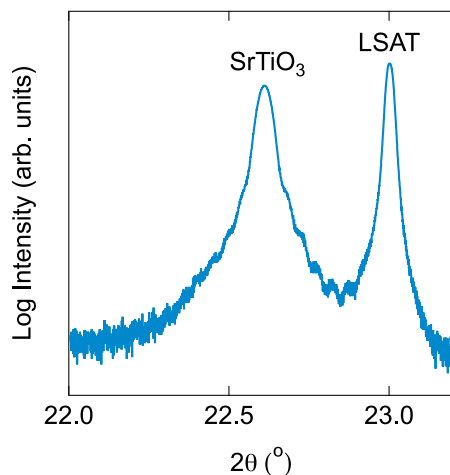

**Fig. S1.  $2\theta$ - $\omega$  scan of a SrTiO<sub>3</sub> film on LSAT near the 001 reflections.** Figure S2 shows a representative reciprocal space map (RSM) of a SrTiO<sub>3</sub>/LSAT heterostructure around the 113 film reflection. The axes denote the out-of-plane ( $q_z$ ) and in-plane ( $q_x$ ) reciprocal lattice vectors, scaled as  $2\pi/a$ , where  $a$  is the real-space lattice spacing of the respective planes. The RSM shows that the in-plane lattice parameter of the SrTiO<sub>3</sub> film is coherently strained to that of the LSAT substrate ( $a = 3.868$  Å).

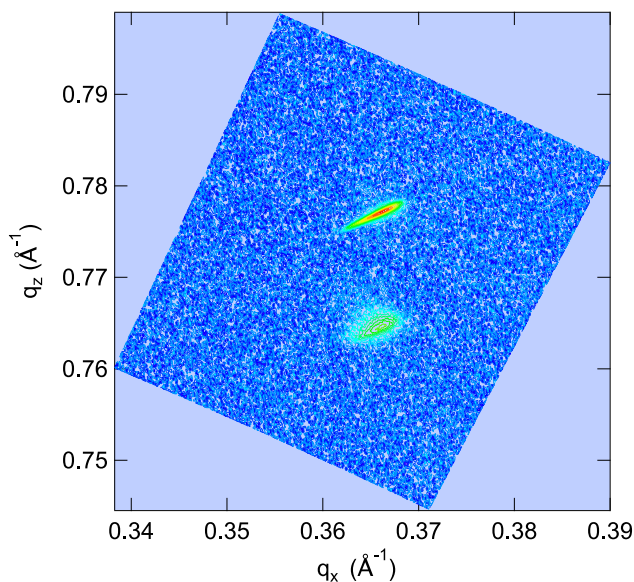

**Fig. S2. RSM of a SrTiO<sub>3</sub>/LSAT heterostructure around the 113 reflection.**

### Transmission electron microscopy

Figure S3 shows a cross-section high-angle annular dark-field (HAADF) imaging in scanning transmission electron microscopy (STEM) image of a SrTiO<sub>3</sub>/LSAT heterostructure. The sample was prepared using a FEI Helios Dualbeam Nanolab 650 focused ion beam (FIB) system with a final milling energy of 5 keV Ga ions. A FEI Titan S/TEM at 300 kV with the convergence angle of 9.6 mrad was used for the imaging. The interface between the LSAT substrate and Sm:SrTiO<sub>3</sub> is atomically abrupt. Low magnification images (not shown) showed no extended defects, as expected for a coherently strained film.

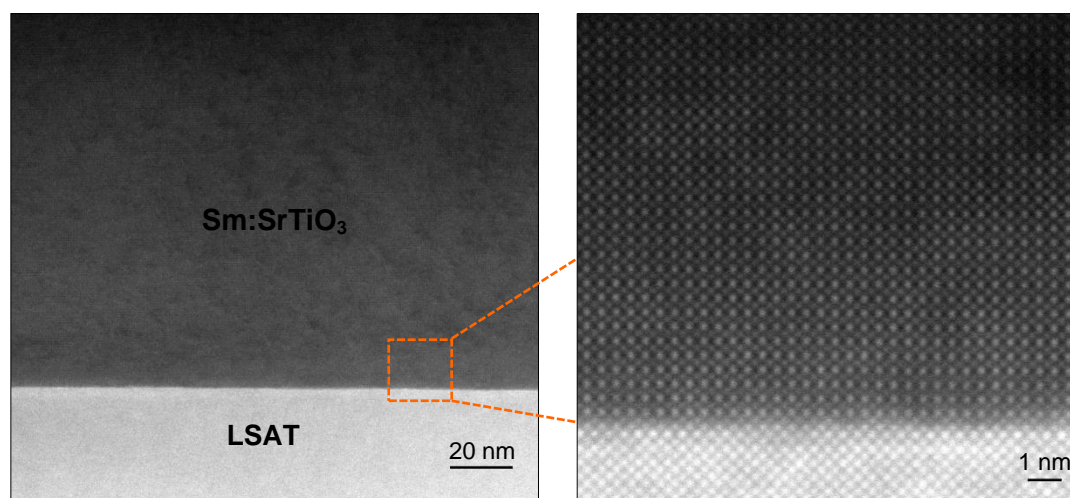

**Fig. S3. Cross-sectional HAADF-STEM images.**

### Measurements of the critical field

Figure S4 shows  $R_{xx}$  as a function of an out-of-plane applied magnetic field for three of the films discussed in the main text. Upper magnetic critical fields ( $H_{C2}$ ) are defined as the intersection with the field axis of the linear extrapolation of the slope in the transition and superconducting states.

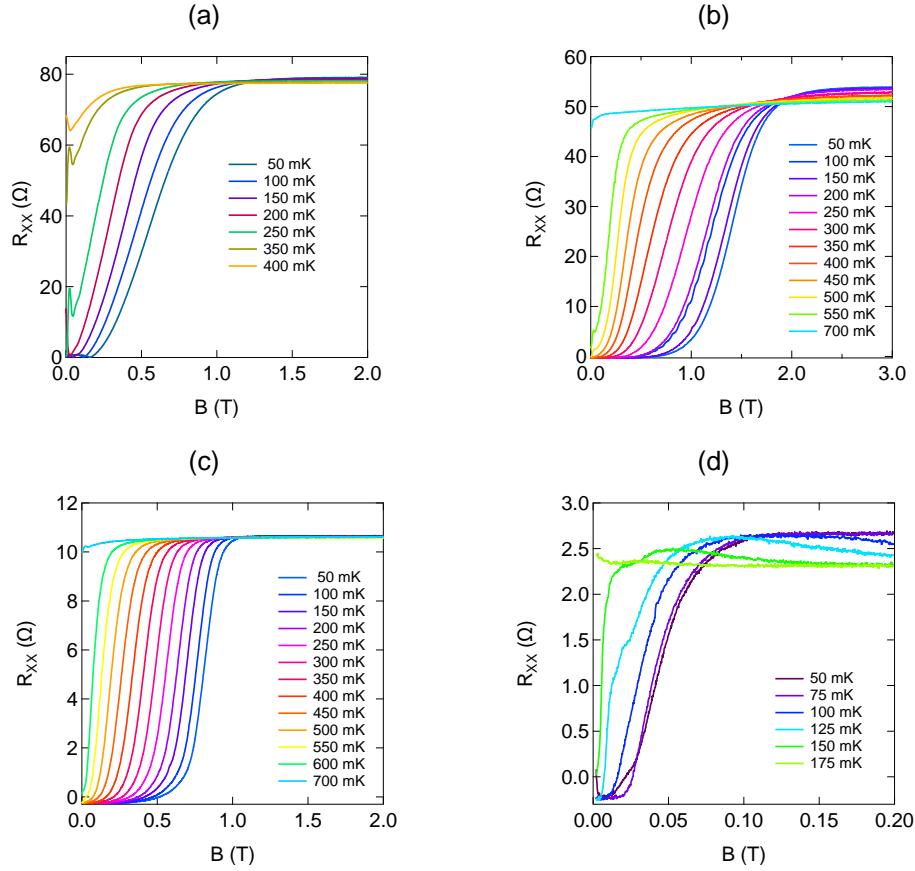

**Fig. S4. Magnetic field dependence of the superconducting transition** for films with carrier densities of (a)  $2 \times 10^{19} \text{ cm}^{-3}$ , (b)  $6 \times 10^{19} \text{ cm}^{-3}$ , (c)  $1.4 \times 10^{20} \text{ cm}^{-3}$  and (d)  $2.8 \times 10^{20} \text{ cm}^{-3}$ .

### Superconducting transitions and normal state transport for Sm- and La-doped SrTiO<sub>3</sub> films grown on SrTiO<sub>3</sub> substrates

Figure S5 shows measurements of  $R_{xx}$  at temperatures between 400 mK and 10 mK for Sm- and La-doped films grown by MBE on SrTiO<sub>3</sub> single crystals. The carrier densities for these films at 2 K were  $7.1 \times 10^{19} \text{ cm}^{-3}$  and  $8.4 \times 10^{19} \text{ cm}^{-3}$ , respectively. Their transition temperatures are shown in Fig. 3 in the main text.

Figure S6 shows the additional data for the temperature dependence of the resistivities of additional Sm-doped SrTiO<sub>3</sub> films on SrTiO<sub>3</sub> substrates. The residual resistivity ratios (RRR) are comparable to those of La-doped SrTiO<sub>3</sub> films (cf. ref. 37 in the main text).

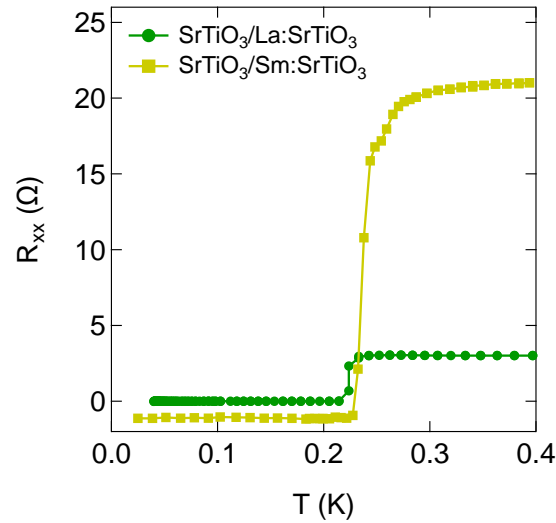

**Fig. S5. Superconducting transitions for Sm- and La-doped SrTiO<sub>3</sub> films grown on SrTiO<sub>3</sub> substrates.**

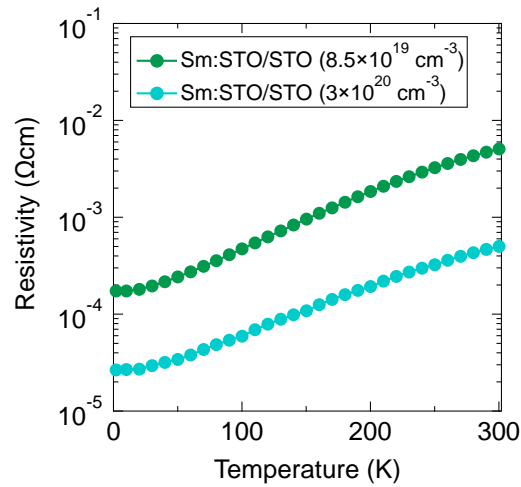

**Fig. S6. Resistivity as a function of temperature for Sm-doped SrTiO<sub>3</sub> films grown on SrTiO<sub>3</sub> substrates.**
